# Supplementary material for: Adolescent Irritability: Phenotypic Associations and Genetic Links With Depressed Mood
Source: Atypon-hosted journal article supplement (doi:10.1176/appi.ajp.2011.10101549), 2011-12-30
Supplement: appi.ajp.2011.10101549_ds001.pdf [file appi.ajp.2011.10101549_ds001.pdf]

**Table S1. Fit Indices for Confirmatory Factor Analysis With Maximum Likelihood Estimation**

|                                        | Time 1                    |            | Time 2                  |            |
|----------------------------------------|---------------------------|------------|-------------------------|------------|
|                                        | Two factors               | One factor | Two factors             | One factor |
| AIC <sup>+</sup>                       | 15920                     | 16026      | 7324                    | 7416       |
| BIC <sup>+</sup>                       | 16050                     | 16150      | 7426                    | 7514       |
| CFI <sup>+</sup>                       | 0.968                     | 0.901      | 0.956                   | 0.828      |
| TLI <sup>+</sup>                       | 0.953                     | 0.861      | 0.929                   | 0.743      |
| RMSEA <sup>+</sup>                     | 0.045                     | 0.078      | 0.056                   | 0.090      |
| $\chi^2$ difference test <sup>++</sup> | 1284.3 (df=6),<br>p<0.001 |            | 709,7 (df=6)<br>p<0.001 |            |

<sup>+</sup>Lower values in the Akaike information criterion (AIC) and the Bayesian information criterion (BIC) are indicative of better model fit for the two-factor solution. The comparative-fit index (CFI) compares the fit of the proposed model with that of a null model (which assumes no relationship between the observed variables) (Raykov, 2006a). CFI values “in the mid- .90s or above” (Raykov, 2006a) suggest plausible approximations to the data. As can be seen values above 0.95 are only achieved for the two factor model. The Tucker-Lewis Index (TLI) follows a similar principle to that of the CFI and models with TLI close to 1 indicate a good fit (Loehlin, 2004). As can be seen, the two factor models are consistently closer to that. The fit of the proposed model with that of a null model also underlies the logic of the root mean square error of approximation (RMSEA) fit index. An RMSEA of 0.05 or less is considered a good approximation to the data (Raykov, 2006b).

<sup>++</sup>This test, implemented in MplusVersion 5, compares the fit of the two to that of the one factor model. The highly significant result indicates that the two-factor model fits the data better than the one-factor solution.

**Table S2. Longitudinal Phenotypic Predictions From Irritability (Excluding the *Stubborn* Item) and Headstrong/Hurtful Behaviors to Dimensional Outcomes of Psychopathology**

|                                    | Depression<br>(Time 2)                   | Delinquency<br>(Time 2)                  |
|------------------------------------|------------------------------------------|------------------------------------------|
| Irritability<br>(time 1)           | <b>.14<sup>***</sup></b><br>(.09 to .20) | <b>.06<sup>*</sup></b><br>(.00 to .11)   |
| Headstrong/<br>hurtful<br>(time 1) | <b>.01</b><br>(-.05 to .07)              | <b>.19<sup>***</sup></b><br>(.12 to .27) |

This table corresponds to the analyses presented in Table 2 of the main paper, except that the irritability scale here does not include the *stubborn* item.

**Table S3. Cross-Sectional Multivariate Genetic Model Results at Time 2**

| <b>Cholesky Model</b>                     | Irritability                      | Headstrong/Hurtful                | Depressive Ratings                | Delinquency                       |
|-------------------------------------------|-----------------------------------|-----------------------------------|-----------------------------------|-----------------------------------|
| <i>Genetic influences</i>                 |                                   |                                   |                                   |                                   |
| Irritability                              | <b>0.35</b><br><b>(0.25-0.44)</b> | 0.66<br>(0.47-0.84)               | 0.76<br>(0.63-0.90)               | 0.68<br>(0.53-0.82)               |
| Headstrong/hurtful                        |                                   | <b>0.34</b><br><b>(0.24-0.44)</b> | 0.44<br>(0.26-0.61)               | 0.72<br>(0.58-0.85)               |
| Depression ratings                        |                                   |                                   | <b>0.46</b><br><b>(0.37-0.54)</b> | 0.58<br>(0.45-0.71)               |
| Delinquency                               |                                   |                                   |                                   | <b>0.46</b><br><b>(0.37-0.55)</b> |
| <i>Nonshared environmental influences</i> |                                   |                                   |                                   |                                   |
| Irritability                              | <b>0.65</b><br><b>(0.56-0.75)</b> | 0.27<br>(0.17-0.36)               | 0.35<br>(0.25-0.44)               | 0.28<br>(0.17-0.37)               |
| Headstrong/hurtful                        |                                   | <b>0.66</b><br><b>(0.56-0.76)</b> | 0.20<br>(0.09-0.30)               | 0.41<br>(0.32-0.50)               |
| Depression ratings                        |                                   |                                   | <b>0.54</b><br><b>(0.47-0.63)</b> | 0.23<br>(0.12-0.33)               |
| Delinquency                               |                                   |                                   |                                   | <b>0.54</b><br><b>(0.45-0.63)</b> |

This table corresponds to Table 3 of the main manuscript, except that cross-sectional analyses from time 2, rather than time 1, are presented.

Figure S1a. Longitudinal Cholesky decomposition with depression as part of the model. The irritability scale does not include the *stubborn* item.

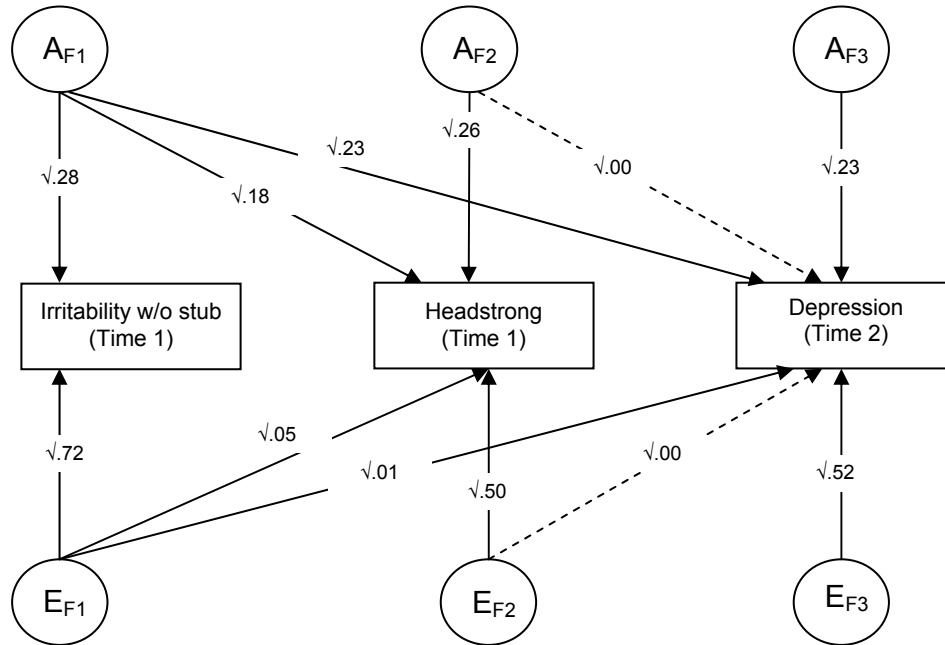

Suppl Figure 1b. Longitudinal Cholesky decomposition with delinquency as part of the model. The irritability item does not include the *stubborn* item.

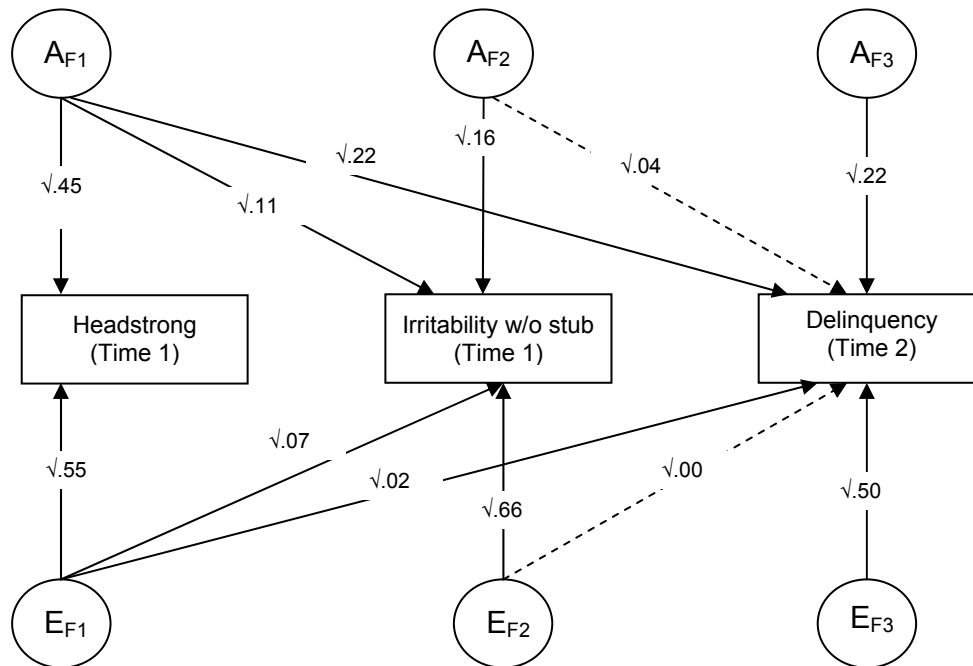

These figures correspond to Figure 2 and b of the main manuscript, except that the *stubborn* item has been removed from the irritability scale.

## References

Loehlin JC: Goodness of Fit Indices: Latent Variable Models, 4th ed. Mahwah, NJ, Lawrence Erlbaum Associates, 2004

Raykov T, Marcoulides GA: Parameter and Model Identification: A First Course in Structural Equation Modeling. Mahwah, NJ, Lawrence Erlbaum Associates, 2006a

Raykov T, Marcoulides GA: Confirmatory Factor Analysis: A First Course in Structural Equation Modeling. Mahwah, NJ, Lawrence Erlbaum Associates, 2006b
